# Supplementary material for: Enhanced electrochemical performance of a polyaniline-based supercapacitor by a bicontinuous microemulsion nanoreactor approach
Source: Royal Society of Chemistry journal article supplement (doi:10.1039/d4ra07348g), 2025-01-01
Supplement: d4ra07348g1.pdf [file d4ra07348g1.pdf]

## Supporting Information

### Enhanced Electrochemical Performance of Polyaniline-based Supercapacitor by Bicontinuous Microemulsion Nanoreactor Approach

Yelriza Yeszhan<sup>a</sup>, Sagdyat Duisenbekov<sup>a</sup>, Dana Kurmangalieva<sup>a</sup>, Dana Kazhigitova<sup>a,b</sup>, Perizat Askar<sup>a</sup>, Yerbol Tileuberdi<sup>c</sup>, Aishuak Konarov<sup>a</sup>, Salimgerey Adilov<sup>d</sup>, Nurxat Nuraje<sup>a,e</sup>

#### Author Information

---

##### Affiliations

<sup>a</sup>Department of Chemical and Materials Engineering, School of Engineering & Digital Science, Nazarbayev University, Astana 010000, Kazakhstan

<sup>b</sup>Department of Chemistry and Chemical Technology, Al-Farabi Kazakh National University, Almaty 050040, Kazakhstan

<sup>c</sup>Institute of Natural Sciences and Geography, Abai Kazakh National Pedagogical University, 13, Dostyk ave., Almaty 050010, Kazakhstan

<sup>d</sup>Department of Chemistry, School of Sciences and Humanities, Nazarbayev University, Astana, 010000 Kazakhstan

<sup>e</sup>Lab of Renewable Energy, National Laboratory Astana, Nazarbayev University, Astana, 010000 Kazakhstan

\*sadilov@nu.edu.kz(S. Adilov)

\*nurxat.nuraje@nu.edu.kz(N. Nuraje)

---

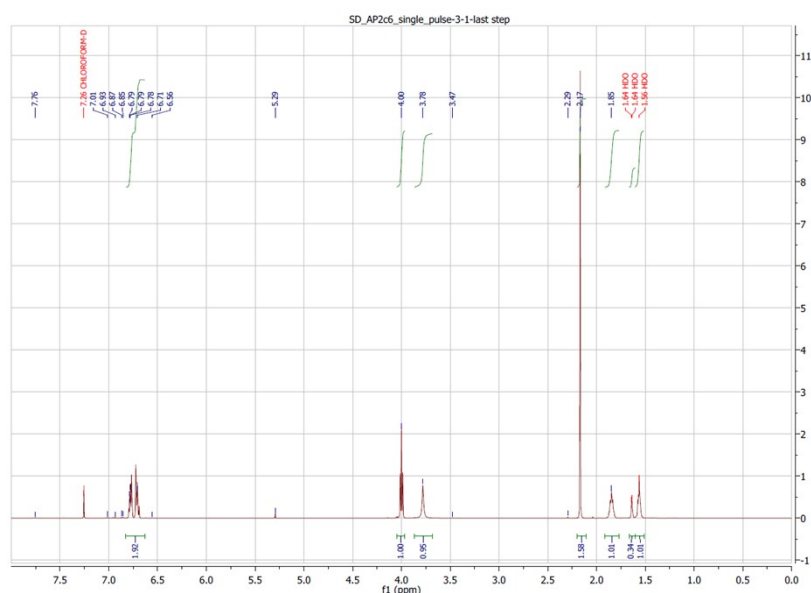

**Figure S1.** <sup>1</sup>H NMR of aniline linker compound (with acetone impurity)

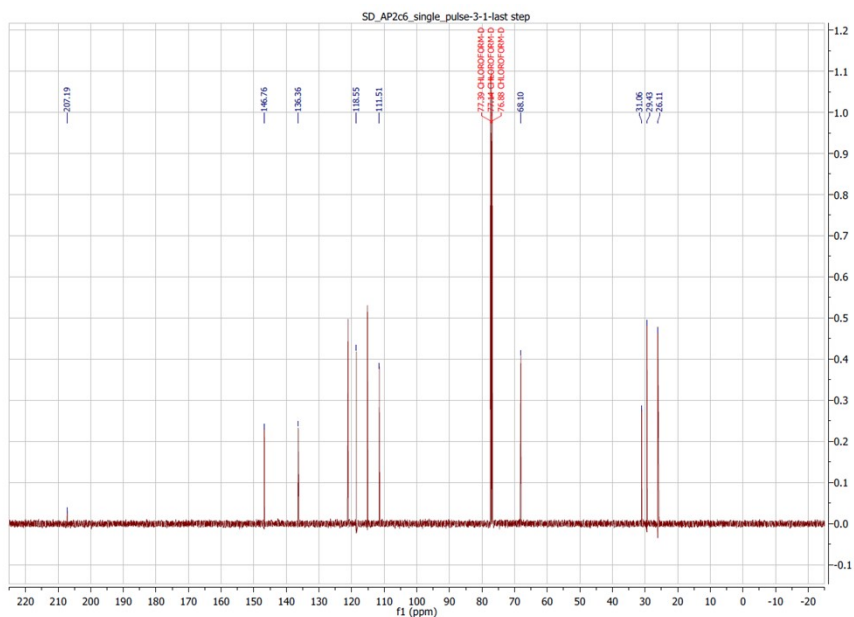

**Figure S2.**  $^{13}\text{C}$  NMR of aniline linker compound (with acetone impurity)

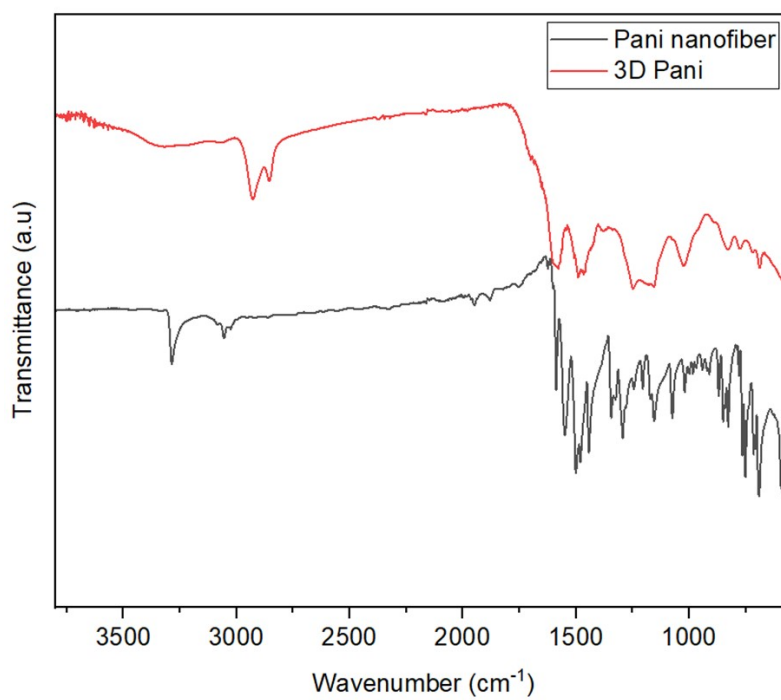

**Figure S3.** FTIR spectra of polymeric materials

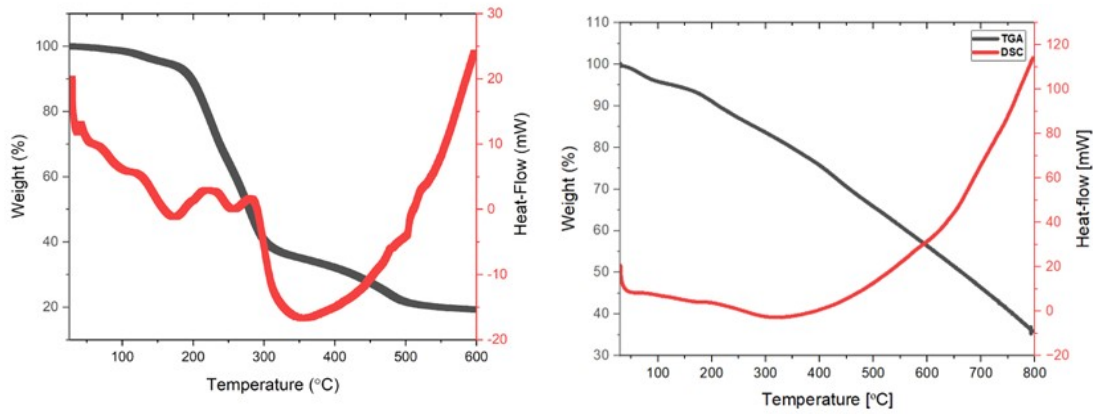

**Figure S4.** TGA/DSC of (a) PANI nanofiber and (b) crosslinked PANI

Figure S5 illustrates the BET  $N_2$  adsorption isotherms of the nanostructured PANI, 2D and 3D PANI. From the isotherm, can be observed that the amount of the adsorbed nitrogen is in this order  $38.7 \text{ cm}^3/\text{g}$  for PANI fiber >  $30.74 \text{ cm}^3/\text{g}$  for 3D PANI >  $19.53 \text{ cm}^3/\text{g}$  for 3D PANI-AB composite >  $15.2 \text{ cm}^3/\text{g}$  for 2D PANI film.

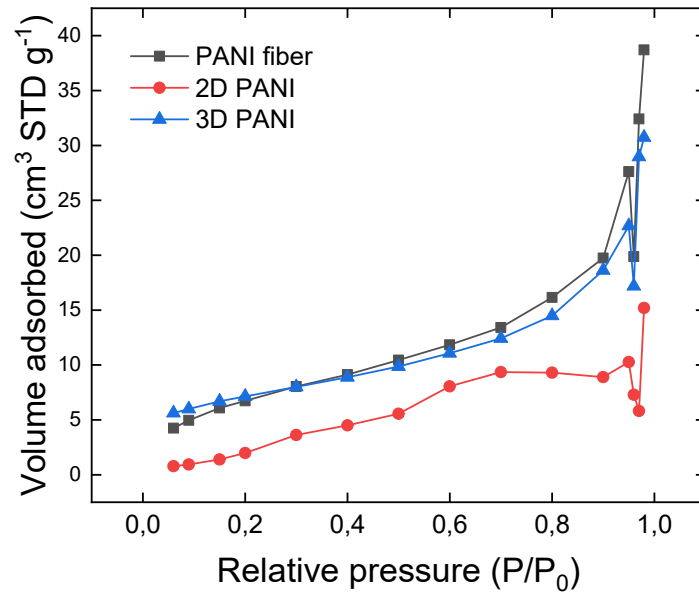

**Figure S5.** The nitrogen adsorption isotherms of polymeric materials
